# Supplementary material for: Effects of Dietary Nano-Zinc Oxide Supplementation on Meat Quality, Antioxidant Capacity and Cecal Microbiota of Intrauterine Growth Retardation Finishing Pigs
Source: MDPI journal article supplement (doi:10.3390/foods12091885), 2023-05-04
Supplement: s1 [file s1]

**Table S1.** Composition and nutrient levels of basal diets for experimental pigs.

| Items                                   | Content |         |          |
|-----------------------------------------|---------|---------|----------|
|                                         | 21-56 d | 57-77 d | 78-163 d |
| Ingredient (%)                          |         |         |          |
| Corn                                    | 24.00   | 65.00   | 62.50    |
| Wheat middling                          | 5.00    | 8.00    | 13.00    |
| Extruded Soybean                        | 5.00    | -       | -        |
| Soybean meal                            | -       | 21.00   | 18.00    |
| Fermented soybean meal                  | 8.00    | -       | -        |
| Broken rice                             | 16.81   | -       | -        |
| Fish meal                               | 3.00    | -       | -        |
| Milk powder                             | 10.00   | -       | -        |
| Whey powder                             | 10.00   | -       | -        |
| Soyben protein concentrate              | 4.00    | -       | -        |
| Yeast                                   | 1.00    | -       | -        |
| Soybean oil                             | 0.65    | 2.00    | 2.50     |
| Cane sugar                              | 3.00    | -       | -        |
| Glucose                                 | 4.00    | -       | -        |
| Dicalcium phosphate                     | 0.74    | -       | -        |
| Limestone                               | 0.80    | -       | -        |
| Premix <sup>1</sup>                     | 4.00    | 4.00    | 4.00     |
| Total                                   | 100.00  | 100.00  | 100.00   |
| Calculated Nutrient levels <sup>2</sup> |         |         |          |
| Digestible energy (MJ/Kg)               | 14.90   | 14.07   | 14.16    |
| Crude protein (%)                       | 19.02   | 16.97   | 16.03    |
| Lysine (%)                              | 1.32    | 0.99    | 0.93     |
| Methionine + cysteine (%)               | 0.78    | 0.68    | 0.66     |
| Threonine (%)                           | 0.83    | 0.69    | 0.65     |
| P (%)                                   | 0.43    | 0.28    | 0.27     |
| Ca (%)                                  | 0.87    | 0.64    | 0.63     |
| Zn (mg/kg)                              | 180.89  | 139.46  | 133.41   |

<sup>1</sup>Premix provided per kilogram of basal diet:

For 21-56 d: Lys (78.8%), 2.50 g; Met (99%), 1.50g; Thr (98%), 0.50 g; NaCL,3.00 g; vitamin E, 80 IU; vitamin A, 10000 IU; vitamin D<sub>3</sub>, 1500 IU; vitamin K<sub>3</sub>, 3.0 mg; biotin, 0.20 mg; niacin, 25 mg; D-pantothenic acid, 30 mg; riboflavin, 3.6 mg; thiamine, 1.0 mg; pyridoxin, 1.5 mg; folic acid, 2.0 mg; choline, 800 mg; Fe (FeSO<sub>4</sub>), 120 mg; Zn (ZnSO<sub>4</sub>), 100 mg; Mn, 80 mg; Cu, 25 mg; I, 0.30 mg; Se, 0.25 mg. Multi-enzyme complex (β-glucanase, 100 U; xylanase, 200 U and phytase, 200 U).

For 57-77 d: Lys(78.8%), 2.50 g; Met (99%), 1.50g; Thr (98%), 0.50 g; NaCL3.00 g, Limestone, 10g; Dicalcium phosphate, 9.0g; vitamin E, 40 IU; vitamin A, 3000 IU; vitamin D<sub>3</sub>, 1000 IU; vitamin K<sub>3</sub>, 1.50 mg; biotin, 0.20 mg; niacin, 20 mg; D-pantothenic acid, 25 mg; riboflavin, 3.5 mg; thiamine, 1.0 mg; pyridoxin, 1.50 mg; folic acid, 1.0 mg; choline, 500 mg; Fe, 110 mg; Zn (ZnSO<sub>4</sub>), 100 mg; Mn, 40 mg; Cu, 15 mg; I, 0.25 mg; Se, 0.20 mg. Multi-enzyme complex (β-glucanase, 300 U; xylanase, 500 U and phytase , 500 U).

For 78-163 d: Lys(78.8%), 2.50 g; Met (99%), 1.50g; Thr (98%), 0.50 g; NaCL3.00 g, Limestone, 10.00g; Dicalcium phosphate, 8.50g; vitamin E, 40 IU; vitamin A, 3000 IU; vitamin D<sub>3</sub>, 1000 IU; vitamin K<sub>3</sub>, 1.50 mg; biotin, 0.20 mg; niacin, 20 mg; D-pantothenic acid, 25 mg; riboflavin, 3.5 mg; thiamine, 1.0 mg; pyridoxin, 1.50 mg; folic acid, 1.0 mg; choline, 500 mg; Fe, 110 mg; Zn (ZnSO<sub>4</sub>), 100 mg; Mn, 40 mg; Cu, 15 mg; I, 0.25 mg; Se, 0.20 mg.

<sup>2</sup> Nutrient levels were calculated values, except for Zn concentration, which was analyzed via fame

atomic absorption spectrometry.

**Table S2.** Sequences for real-time PCR primers.

| Gene name <sup>1</sup> | Accession No   | Primer sequence (5' to 3')                          | Product size (bp) |
|------------------------|----------------|-----------------------------------------------------|-------------------|
| MyHc I a               | NM_213855.2    | F: ACCAACCTGTCCAAGTTCCG<br>R: AGGACTGGGAGCTTTGTTGC  | 193               |
| MyHc II a              | NM_214136.1    | F: GGACCCCTGAATGACACAG<br>R: CGGTCTGGAAGGAAGAACCC   | 149               |
| MyHc II x              | NM_001104951.2 | F: ACATTACTGGCTGGCTGGAC<br>R: CTTTCCACCTCCAGCCTCTG  | 140               |
| MyHc II b              | NM_001123141.1 | F: AGGAGCATCAGCGCCTAATC<br>R: TCGGGATAGCTGAGACACCA  | 119               |
| Nrf2                   | XM_013984303.2 | F: ATCCAGCGGATTGCTCGTAG<br>R: TCAAATCCATGTCCTTGCG   | 155               |
| Keap1                  | NM_001114671.1 | F: TCTGCTTAGTCATGGTGACCT<br>R: GGGGTTCCAGATGACAAGGG | 158               |
| GCLM                   | XM_001926378.4 | F: GGACAAAACCCAGTTGGAGC<br>R: TCACACAGCAAGAGGCAAGA  | 86                |
| GCLC                   | XM_003482164.4 | F: CTAGTGGGTAGGCGGACTGG<br>R: CGGTGTCGTGCTCTAGCTTC  | 81                |
| HO-1                   | NM_001004027.1 | F: CAAGCAGAAAATCCTCGAAG<br>R: GCTGAGTGTCAGGACCCATC  | 241               |
| GPX1                   | NM_214201.1    | F: CCTCAAGTACGTCCGACCAG<br>R: GTGAGCATTTGCGCCATTCA  | 85                |
| GPX4                   | NM_214407.1    | F: CACCCTCTGTGGAAGTGGAT<br>R: TCACCACACAGCCGTTCTTA  | 112               |
| NQO1                   | NM_001159613.1 | F: GATCATACTGGCCCACTCCG<br>R: GTGAGCCGACTGAACACCAT  | 200               |
| GR                     | AY368271.1     | F: CAGGATGTGAGGAGCTGTGT<br>R: CAGGACACCCAGGACCAATC  | 141               |
| GSTA1                  | NM_214389.2    | F: GTCTCAGGTACATTCCGGGAG<br>R: GCAGAAGGTGCCTGTCTTGA | 202               |
| GSTT1                  | NM_001315568.1 | F: AGGCCAGGTACTCATCCACT<br>R: TACGATGTGCTGTCCCCCTA  | 149               |
| GSTK1                  | NM_001315574.1 | F: ATAGCTGGTGGCTGGTTTCC<br>R: ATGGTGAAGGTCGGAGTGAA  | 140               |
| GAPDH                  | NM_001206359.1 | F: CCGTGGGTGGAATCATACTG<br>R: CCGTGGGTGGAATCATACTG  | 155               |

MyHc, myosin heavy chain; Nrf2, Nuclear factor erythroid-derived 2-like 2; Keap1, Kelch-like ECH-associated protein 1; GCLM, glutamate-cysteine ligase modifier subunit; GCLC, glutamate-cysteine ligase catalytic subunit; HO-1, heme oxygenase 1; GPX, glutathione peroxidase; NQO1, NAD(P)H dehydrogenase, quinone 1; GR, glutathione reductase; GSTA1, glutathione S-transferase alpha 1; GSTT1, glutathione S-transferase theta-1; GSTK1, glutathione S-transferase kappa 1.
